# Supplementary material for: Mid-term evaluation of Maternal and Child Nutrition Programme (MCNP II) in Kenya
Source: Springer Nature journal article supplement (doi:10.1186/s12889-022-14627-2), 2022-11-28

# Mid-term Evaluation of Maternal and Child Nutrition Programme (MCNP II) in Kenya

## Annexes

### Annex 1: Theory of Change

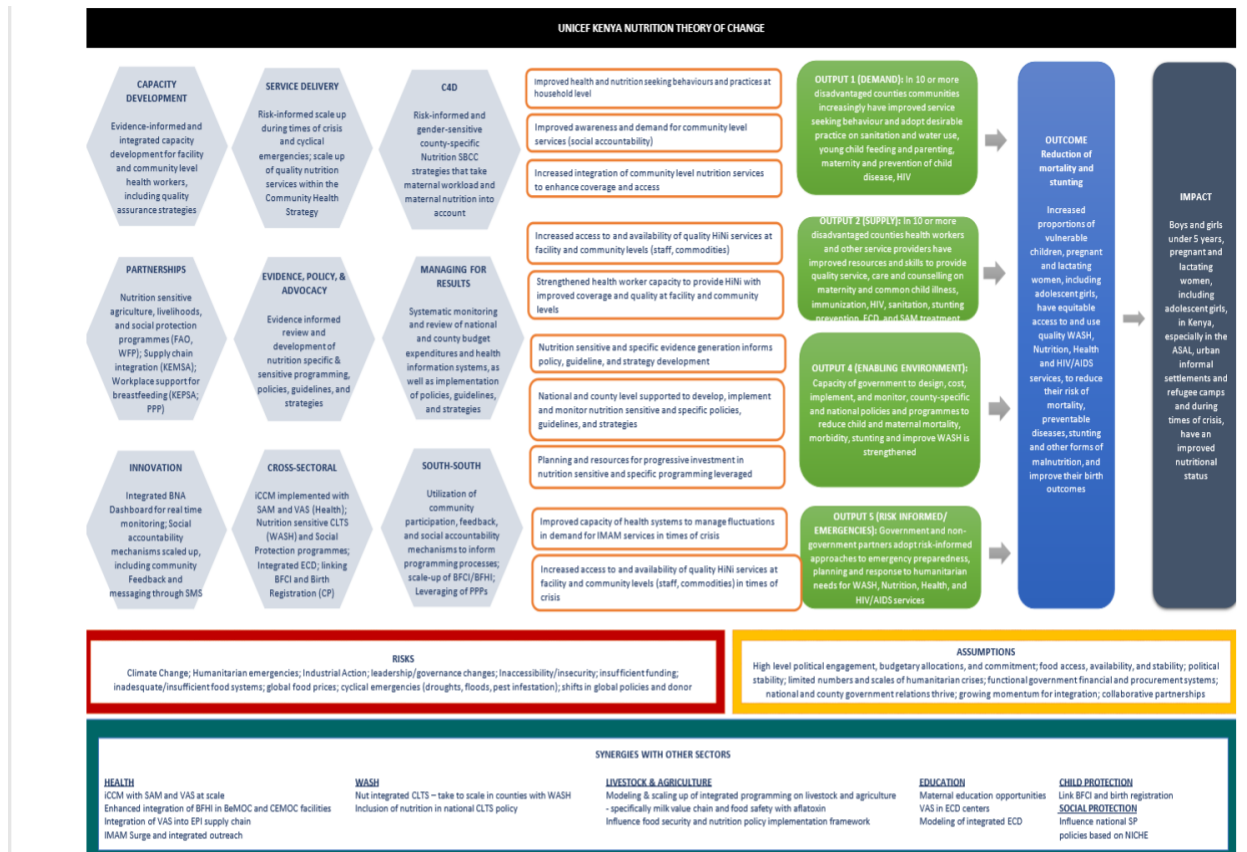

Supplement: MOESM1 [file 23763808]
